# Supplementary material for: Many Ribosomal Protein Genes Are Cancer Genes in Zebrafish
Source: PubMed Central journal article supplement (PMC406397; doi:10.1371/journal.pbio.0020139), 2004-05-11

200 bp

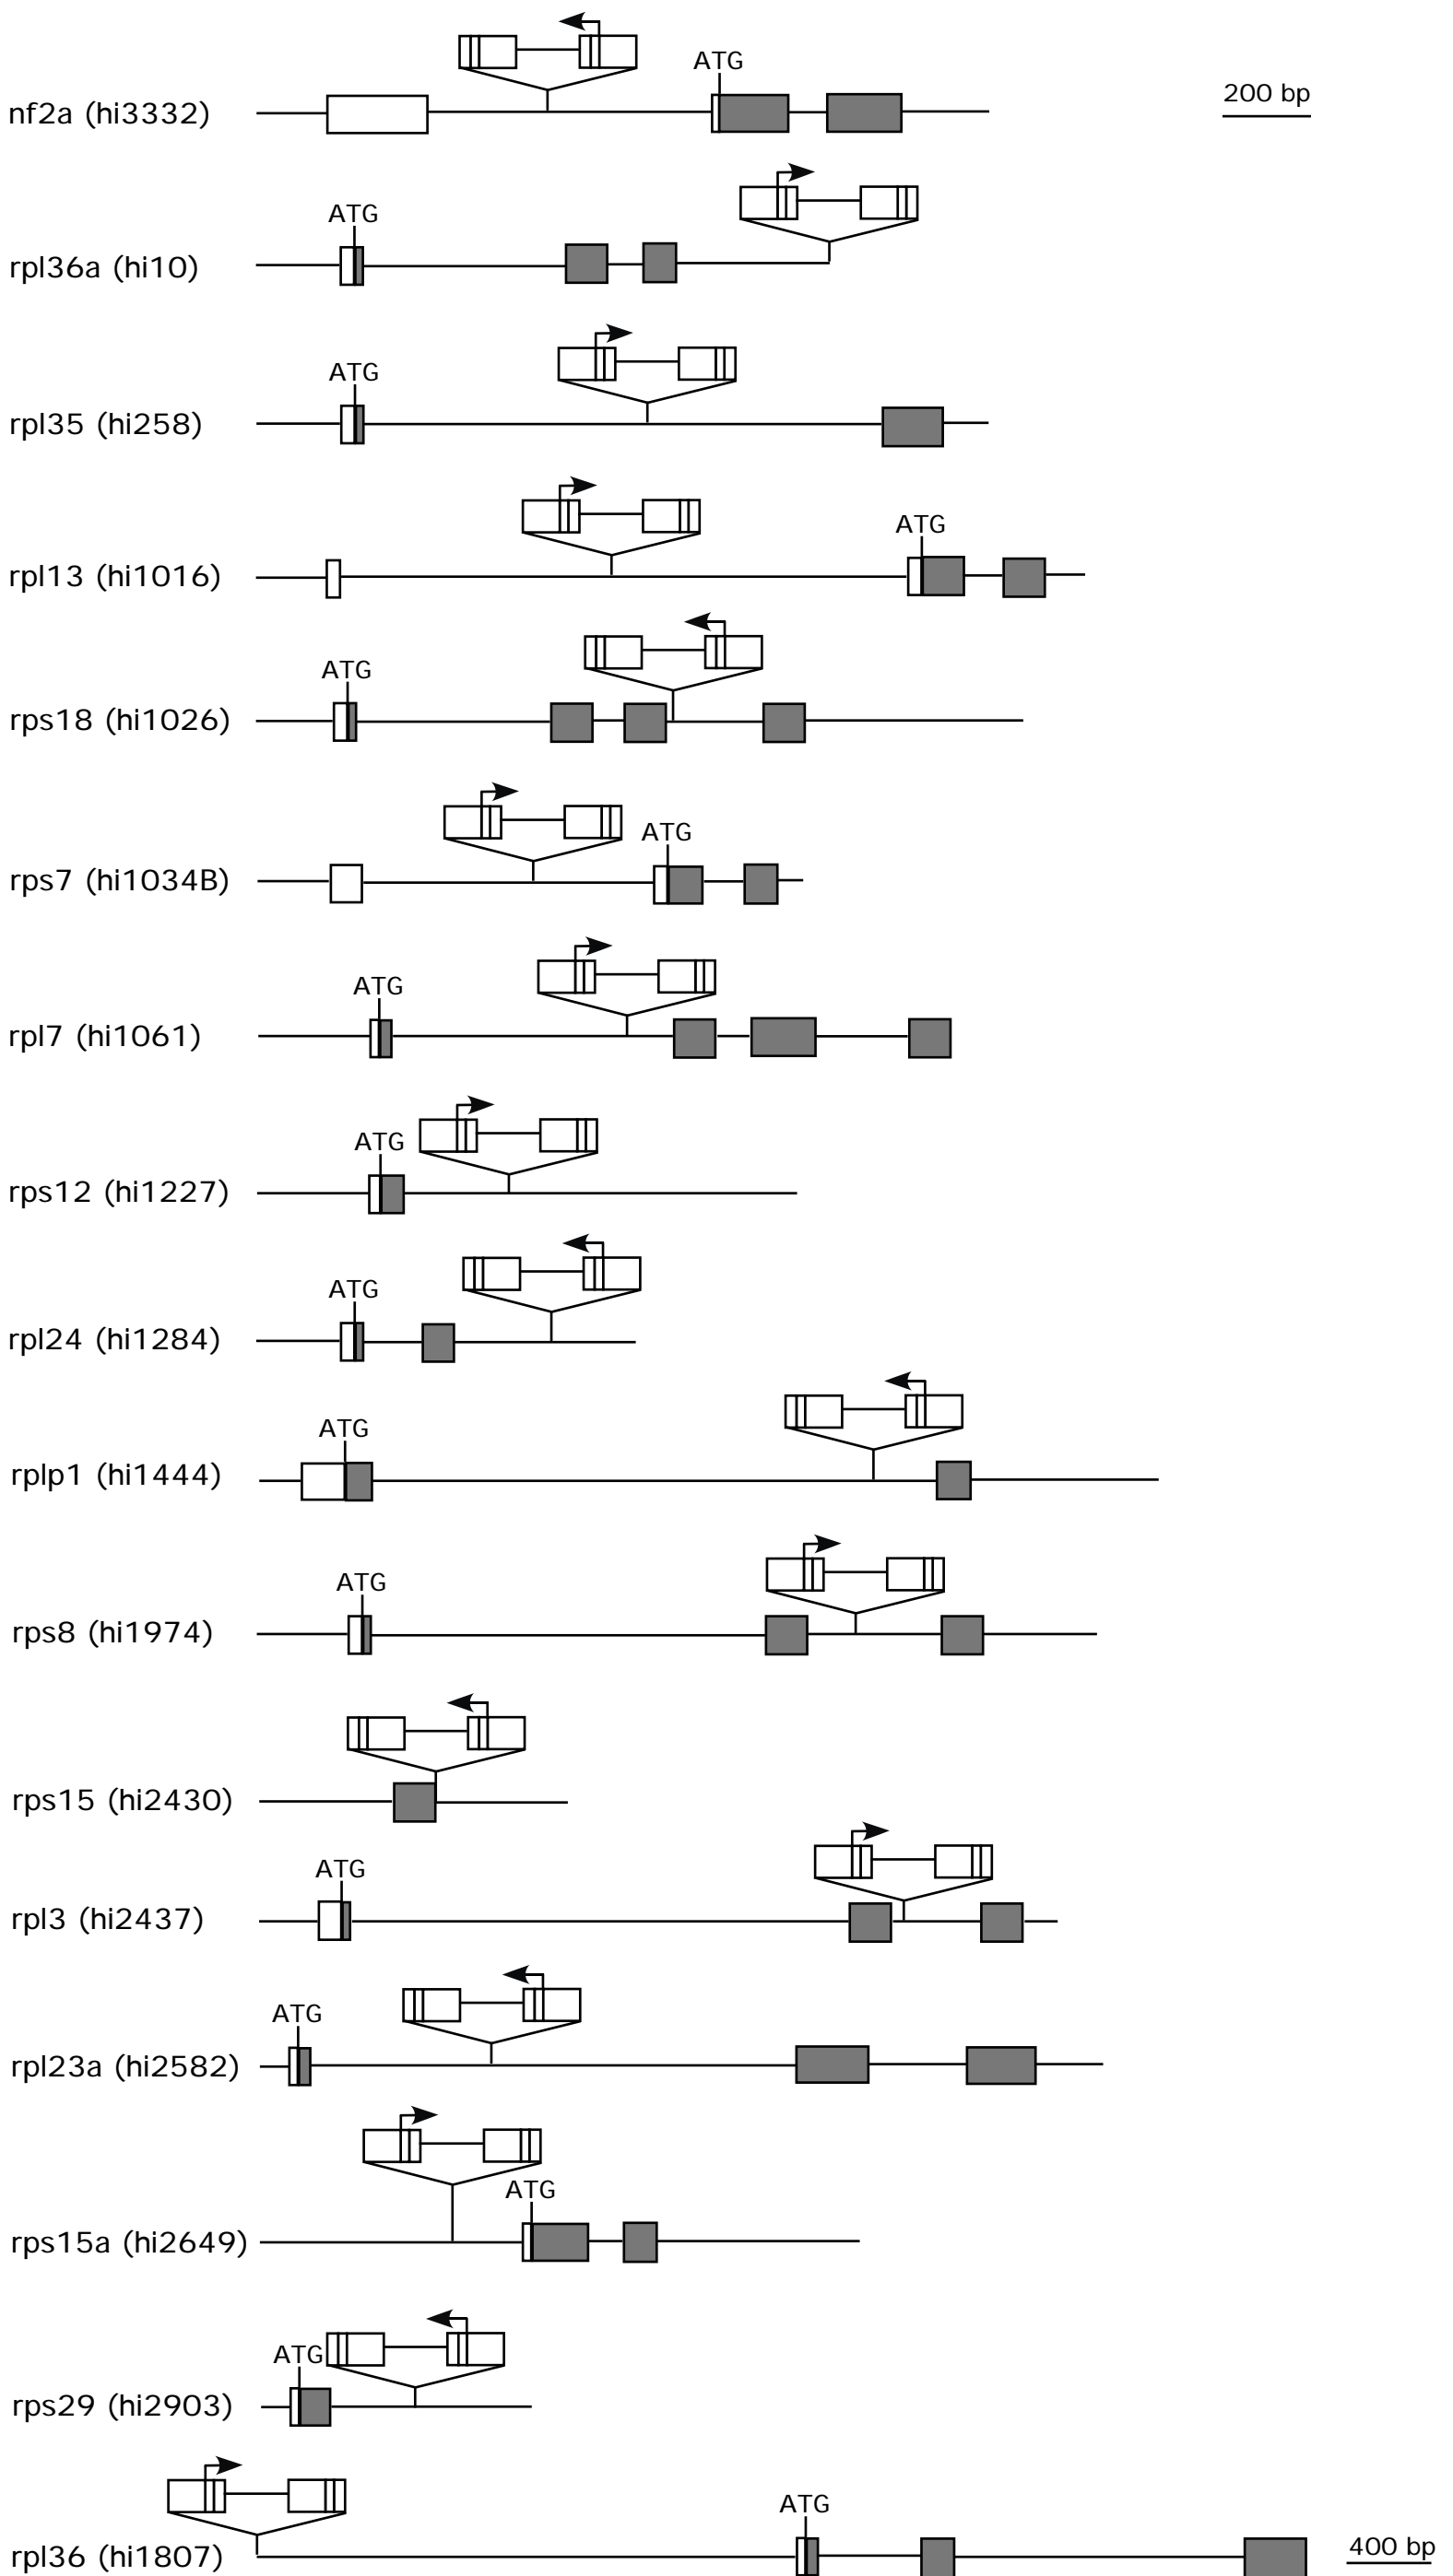

Supplement: pbio.0020139.sg001.pdf [file pbio.0020139.sg001.pdf]
